# Supplementary material for: Clinical sequencing identifies potential actionable alterations in a high rate of urachal and primary bladder adenocarcinomas
Source: Research Square preprint supplement (doi:10.21203/rs.3.rs-1757372/v1), 2022-06-23
Supplement: Supplementary file 1 [file 5742e6bb10d5058dd27d3239.xlsx]

## Sheet: QCI - UrC - Targeted
Individual patient based targeted therapeutic recommendations and contraindications in UrC
			Targeted therapy
			sensitive / not recommended / resistance
Patient	Gene	Alteration	duvelisib	decitabine	idealisib/ idelalisib/rituximab	lenalidomide/ rituximab	acalabrutinib	acalabrutinib / obinutuzumab	bortezomib/ rituximab	ibrutinib	obinutuzumab/venetoclax	rituximab / venetoclax	venetoclax	regorafenib	aflibercept	cobimetinib	trametinib	selumetinib	sotorasib	brigatinib	cabozantinib	dacomitinib	bosutinib	capmatinib	cetuximab sarotalocan	lapatinib	necitumumab	neratinib	nintedanib	olaparib	ponatinib	tepotinib	vandetanib	alpelisib	amivantamab	copanlisib	erdafitinib	lenvatinib	pazopanib	pemigatinib	selpercatinib	everolimus	mobocertinib	sirolimus	sorafenib	abemaciclib	binimetinib	dabrafenib	decitabine/venetoclax
UrC_1	CCND1	AMP
	PIK3CA	p.His1047Arg
UrC_2	KRAS	p.Gly12Val
	TP53	p.Arg342Ter
		p.Val73fs
UrC_3	TP53	p.Arg248Trp
		p.Val73fs
UrC_4	TP53	p.Leu257fs
UrC_5	TP53	p.Arg282Trp
		p.Val73fs
UrC_6	CDK4	AMP
	FGFR2	AMP
	MYC	AMP
	TP53	p.Gly266Val
UrC_7	KRAS	p.Ala146Thr
	TP53	p.Arg248Gln
		p.Val73fs
UrC_8	MYC	AMP
	TP53	p.Leu344Pro
UrC_9	CCND1	AMP
UrC_10	KRAS	p.Gly12Val
	MYC	AMP
	TP53	p.Arg282Trp
		p.Val73fs
UrC_11	EGFR	AMP
	FLT3	AMP
	MSH2	p.Trp117Ter
	MET	p.Gln1043Ter
	NF1	p.Trp1314Ter
		p.Trp696Ter
		p.Trp2229Ter
	PALB2	p.Gln1044Ter
	PIK3R1	p.Trp237Ter
	TP53	p.Arg175His
		p.Val73fs
UrC_12	TP53	p.Arg175His
UrC_13	KRAS	p.Gly12Val
	MYC	AMP
	TP53	p.Arg175His
UrC_14	TP53	p.Tyr236Asp
UrC_15	KRAS	AMP
		p.Gly12Val
	TP53	p.Arg248Pro
		p.Val73fs
UrC_16	CDK12	p.Gln286Ter
	ERBB2	AMP
	MYC	AMP
	TP53	p.Arg175His
		p.Arg342Ter
		p.Val73fs
UrC_17	IDH1	p.Arg132Cys
	KRAS	p.Gly12Asp
UrC_18	TP53	p.Arg175His
UrC_19	TP53	p.Arg282Trp
UrC_20	FGFR3	AMP
	TP53	p.Cys275Tyr
UrC_21	CDK12	p.Gln115Ter
	EGFR	AMP
	TP53	p.Trp91fs
UrC_22	TP53	p.Tyr126His
UrC_23	KRAS	p.Gly12Val
	TP53	p.Arg282Trp
		p.Val73fs
UrC_24	BRAF	p.Arg603Gln
	EGFR	p.Gly465Arg
		p.Ser811Phe
	FGFR2	p.Met537Ile
	MET	p.Gln1011Ter
	NRAS	p.Ala59Thr
	PIK3CA	p.Ala1046Val
	TP53	p.Arg280Thr
		p.His168Tyr
		p.Pro219Ser
		p.Ser90Phe
		p.Thr230Ile
UrC_25	TP53	p.Arg273Cis
UrC_26	CCND1	AMP
UrC_27	KRAS	p.Gly12Val
UrC_28	MET	AMP
	TP53	p.Arg175His
UrC_29	TP53	p.Arg65fs*58
UrC_30	MET	AMP
	TP53	p.Glu294Ter
UrC_31	BRCA2	p.K3326Ter
	TP53	p.Lys132Arg
[truncated: 59 more columns]

## Sheet: QCI - UrC - Chemo
Individual patient based chemotherapeutic recommendations and contraindications in UrC
			Chemotherapy																																					Combination									Others
			sensitive / not recommended / resistance																																					sensitive									sensitive / resistance
Patient	Gene	Alteration	5-azacytidine	fludarabinephosphate	tipiracil	fluoropyrimidine	5-fluorouracil/ irinotecan/ leucovorin/oxaliplatin	capecitabine/ oxaliplatin	arsenic trioxide	5-fluorouracil/ leucovorin	thalidomine	carboplatin	platinum agent	platinum chemotherapy regimen	anthracycline	temozolomide	cyclophosphamide/ doxorubicin	cyclophosphamide/ epirubicin	cisplatin/ gemcitabine	carboplatin/gemcitabine	carboplatin/paclitaxel	cisplatin/docetaxel	cisplatin/paclitaxel	cisplatin/pemetrexed	docetaxel	gemcitabine	paclitaxel	pemetrexed	cisplatin	cyclophosphamide	cytarabine	dexamethasone	doxorubicin	etoposide	mitoxantrone	vincristine	vinorelbine	chlorambucil	fludarabine	5-azacytidine/venetoclax	capecitabine/trastuzumab/tucatinib	carboplatin/docetaxel/recombinant human hyaluronidase/trastuzumab	cyclophosphamide/docetaxel/doxorubicin/ recombinant human hyaluronidase/ trastuzumab	cyclophosphamide/ doxorubicin/ paclitaxel/ recombinant human hyaluronidase/ trastuzumab	docetaxel/pertuzumab/recombinant human hyaluronidase/ trastuzumab	docetaxel/trastuzumab	fluoropyrimidine/pembrolizumab/platinum agent/trastuzumab	paclitaxel/recombinant human hyaluronidase/trastuzumab	rofecoxib
UrC_1	CCND1	AMP
	PIK3CA	p.His1047Arg
UrC_2	KRAS	p.Gly12Val
	TP53	p.Arg342Ter
		p.Val73fs
UrC_3	TP53	p.Arg248Trp
		p.Val73fs
UrC_4	TP53	p.Leu257fs
UrC_5	TP53	p.Arg282Trp
		p.Val73fs
ÚrC_6	FGFR2	AMP
	MYC	AMP
	TP53	p.Gly266Val
UrC_7	KRAS	p.Ala146Thr
	TP53	p.Arg248Gln
		p.Val73fs
UrC_8	MYC	AMP
	TP53	p.Leu344Pro
UrC_9	CCND1	AMP
UrC_10	KRAS	p.Gly12Val
	MYC	AMP
	TP53	p.Arg282Trp
		p.Val73fs
UrC_11	EGFR	AMP
	PALB2	p.Gln1044Ter
	TP53	p.Arg175His
		p.Val73fs
UrC_12	TP53	p.Arg175His
UrC_13	KRAS	p.Gly12Val
	MYC	AMP
	TP53	p.Arg175His
UrC_14	TP53	p.Tyr236Asp
UrC_15	KRAS	p.Gly12Val
	TP53	p.Arg248Pro
		p.Val73fs
UrC_16	ERBB2	AMP
	MYC	AMP
	TP53	p.Arg175His
		p.Arg342Ter
		p.Val73fs
UrC_17	IDH1	p.Arg132Cys
	KRAS	p.Gly12Asp
UrC_18	TP53	p.Arg175His
UrC_19	TP53	p.Arg282Trp
UrC_20	TP53	p.Cys275Tyr
UrC_21	EGFR	AMP
	TP53	p.Trp91fs
UrC_22	TP53	p.Tyr126His
UrC_23	KRAS	p.Gly12Val
	TP53	p.Arg282Trp
		p.Val73fs
UrC_24	FGFR2	p.Met537Ile
	NRAS	p.Ala59Thr
	PIK3CA	p.Ala1046Val
	TP53	p.Arg280Thr
		p.His168Tyr
		p.Pro219Ser
		p.Ser90Phe
		p.Thr230Ile
UrC_25	TP53	p.Arg273Cis
UrC_26	CCND1	AMP
UrC_27	KRAS	p.Gly12Val
UrC_28	TP53	p.Arg175His
UrC_29	TP53	p.Arg65fs
UrC_30	TP53	p.Glu294Ter
UrC_31	BRCA2	p.K3326Ter
	TP53	p.Lys132Arg
[truncated: 1 more columns]

## Sheet: QCI - PBAC - Targeted
Individual patient based targeted therapeutic recommendations and contraindications in PBAC
			Targeted therapy
			sensitive / not recommended / resistance
Patient	Gene	Alteration	acalabrutinib	acalabrutinib / obinutuzumab	alemtuzumab	bortezomib/ rituximab	decitabine	duvelisib	ibrutinib	idealisib/ idelalisib/rituximab	lenalidomide/ rituximab	obinutuzumab/venetoclax	rituximab / venetoclax	venetoclax	aflibercept	cobimetinib	regorafenib	selumetinib	sotorasib	trametinib	brigatinib	bosutinib	cabozantinib	dacomitinib	fedratinib	gilteritinib	lapatinib	midostaurin	neratinib	nintedanib	pexidartinib	ponatinib	pralsetinib	quizartinib	sorafenib	sunitinib	abemaciclib	anastrozole	aromatase inhibitor/trastuzumab	cetuximab sarotalocan	exemestane	fulvestrant	lapatinib/ letrozole & lapatinib/trastuzumab	letrozole	margetuximab	necitumumab	olaparib	palbociclib	pertuzumab
PBAC_1	ERBB2	AMP
	FLT3	AMP
	MYC	AMP
	TP53	p.Arg209fs
PBAC_2	EGFR	AMP
	MYC	AMP
	TP53	p.Glu285Lys
PBAC_3	KRAS	p.Gly12Val
PBAC_4	KRAS	p.Gly12Val
PBAC_5	TP53	p.Arg248Trp
PBAC_6	MYC	AMP
	TP53	p.Val272Met
PBAC_7	CDK4	AMP
PBAC_8	FLT3	AMP
	KRAS	p.Gly12Val
	TP53	p.Pro27fs
[truncated: 30 more columns]

## Sheet: QCI - PBAC - Chemo
Individual patient based chemotherapeutic recommendations and contraindications in PBAC
			Chemotherapy																								Combination								Other
			sensitive / not recommended / resistance																								sensitive								resistance
Patient	Gene	Alteration	5-azacytidine	fludarabinephosphate	capecitabine/ oxaliplatin	5-fluorouracil/ irinotecan/ leucovorin/oxaliplatin	fluoropyrimidine	tipiracil	anthracycline	capecitabine	cyclophosphamide/ doxorubicin	cyclophosphamide/ epirubicin	carboplatin/gemcitabine	carboplatin/paclitaxel	cisplatin/ gemcitabine	cisplatin/docetaxel	cisplatin/paclitaxel Niki	cisplatin/pemetrexed	docetaxel	gemcitabine	paclitaxel	pemetrexed	cisplatin	vinorelbine	chlorambucil	fludarabine	capecitabine/trastuzumab/tucatinib	carboplatin/docetaxel/recombinant human hyaluronidase/trastuzumab	cyclophosphamide/docetaxel/doxorubicin/ recombinant human hyaluronidase/ trastuzumab	cyclophosphamide/ doxorubicin/ paclitaxel/ recombinant human hyaluronidase/ trastuzumab	docetaxel/pertuzumab/recombinant human hyaluronidase/ trastuzumab	docetaxel/trastuzumab	fluoropyrimidine/pembrolizumab/platinum agent/trastuzumab	paclitaxel/recombinant human hyaluronidase/trastuzumab	prednisolone
PBAC_1	ERBB2	AMP
	MYC	AMP
	TP53	p.Arg209fs
PBAC_2	EGFR	AMP
	MYC	AMP
	TP53	p.Glu285Lys
PBAC_3	KRAS	p.Gly12Val
PBAC_4	KRAS	p.Gly12Val
PBAC_5	TP53	p.Arg248Trp
PBAC_6	MYC	AMP
	TP53	p.Val272Met
PBAC_8	KRAS	p.Gly12Val
	TP53	p.Pro27fs
